# Supplementary figures and images for: Determination of single cell surface protein expression using a tagless microfluidic method
Source: Royal Society of Chemistry journal article supplement (doi:10.1039/c2lc21180g), 2012-01-01

**A.**

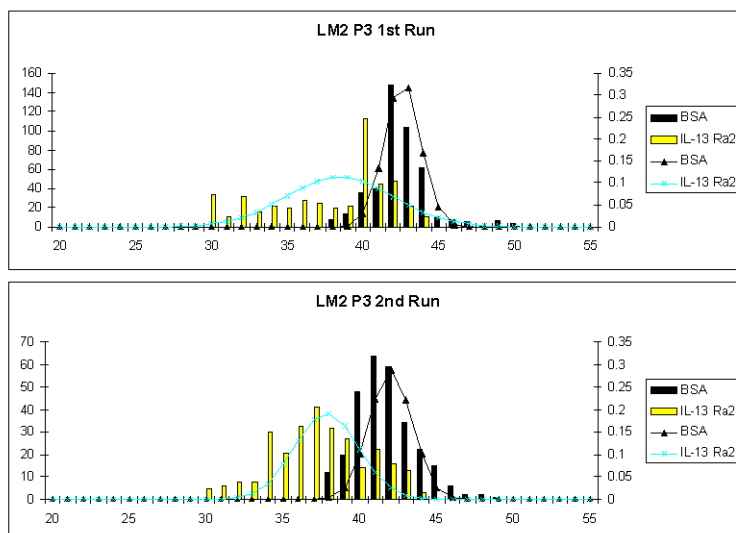

**B.**

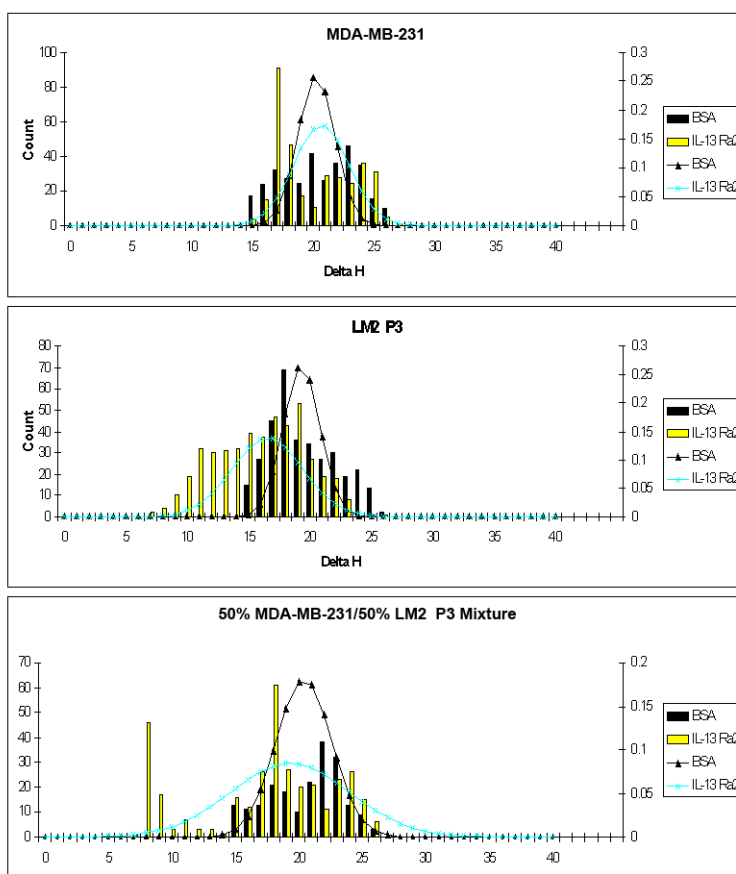

Supplement: c2lc21180g_2.pdf [file c2lc21180g_2.pdf]

**A. MDA-MB-231 cells**

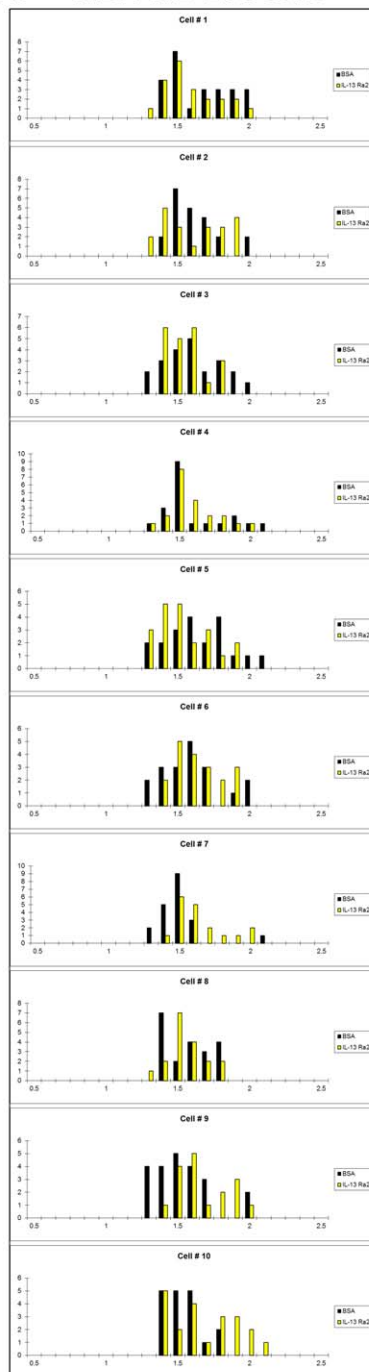

**B. LM2 P3 cells**

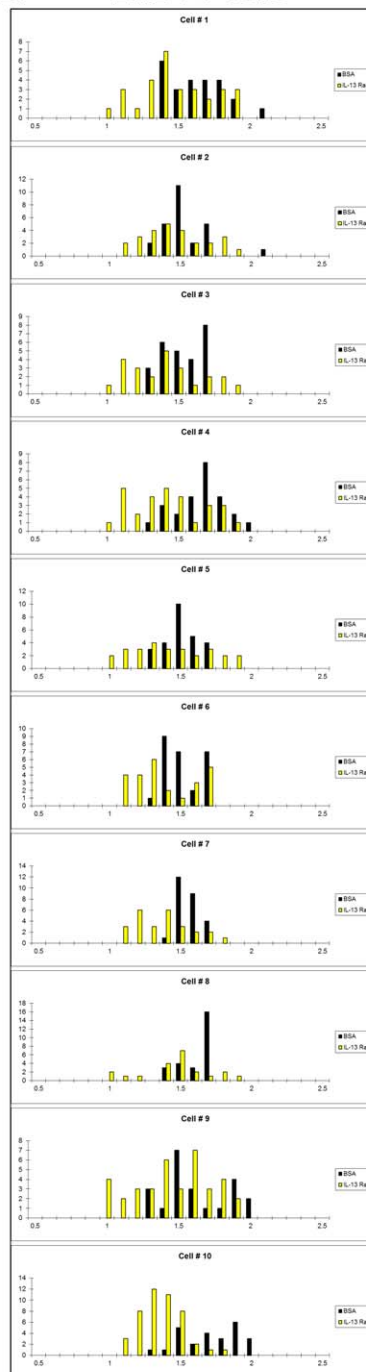

Supplement: c2lc21180g_3.pdf [file c2lc21180g_3.pdf]

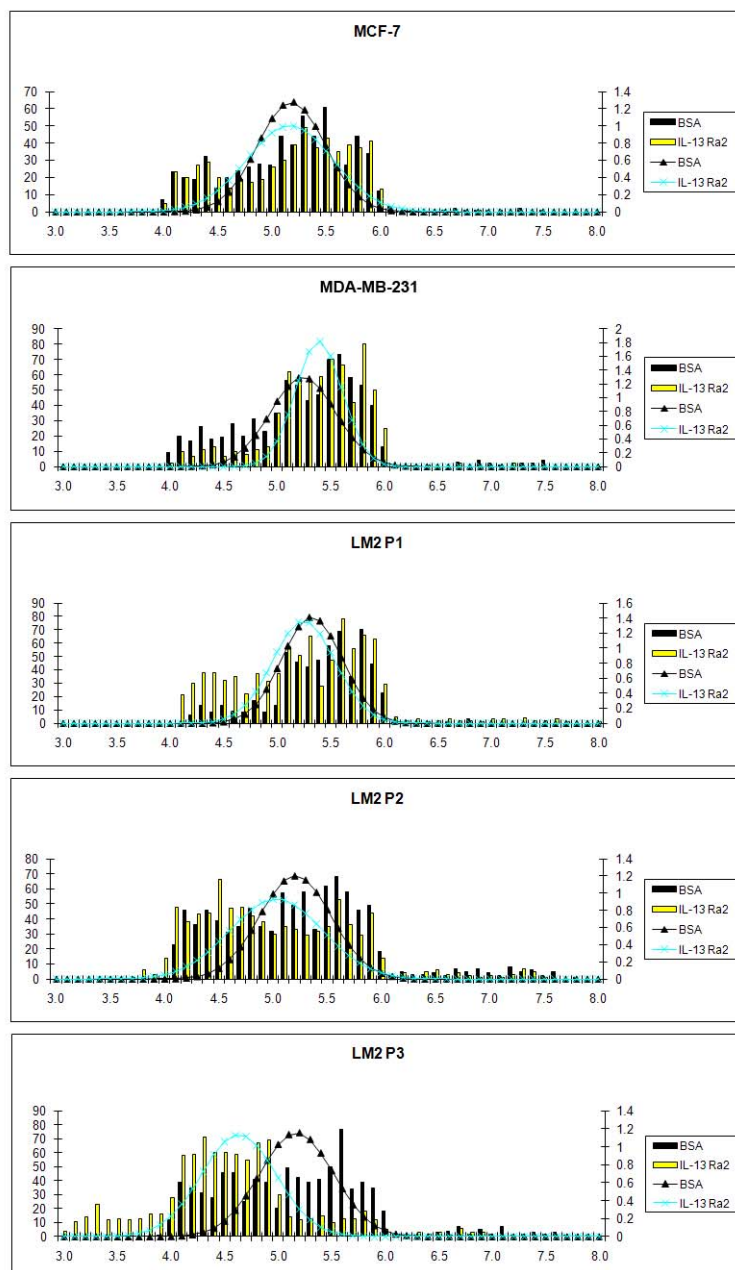

Supplement: c2lc21180g_4.pdf [file c2lc21180g_4.pdf]

**A.**

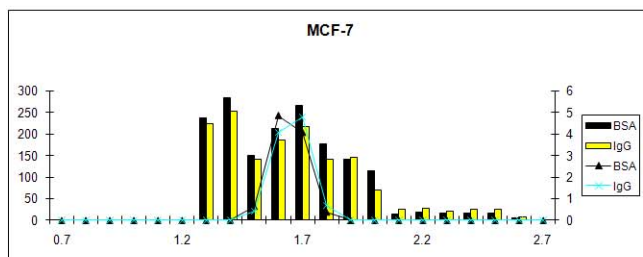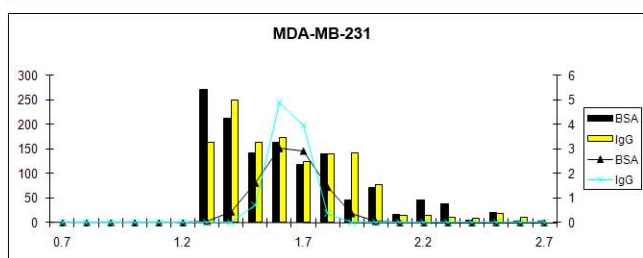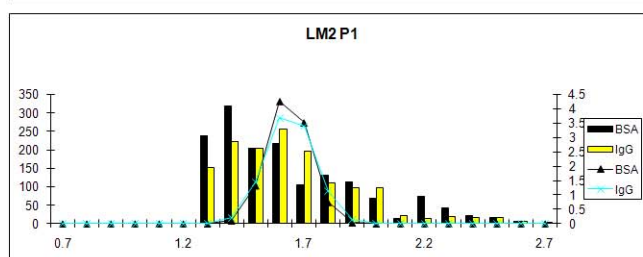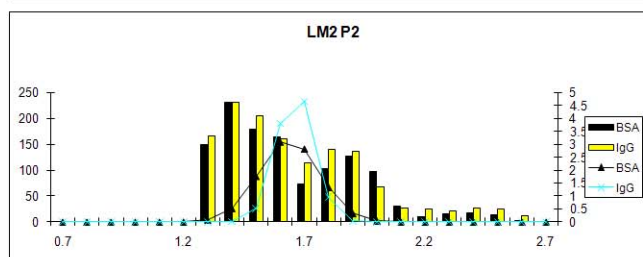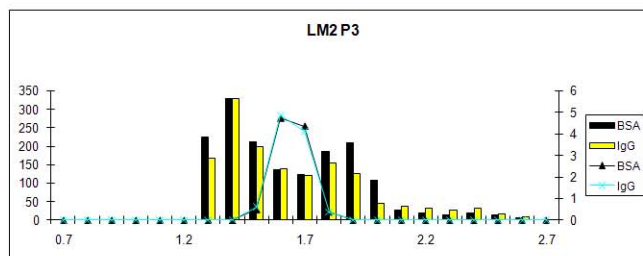

**B.**

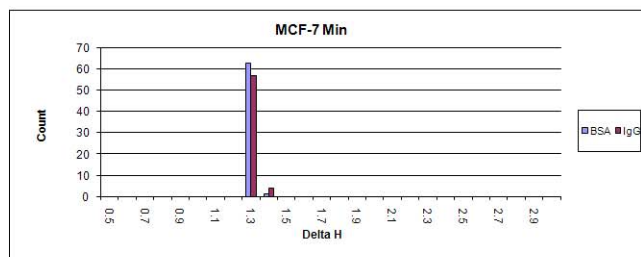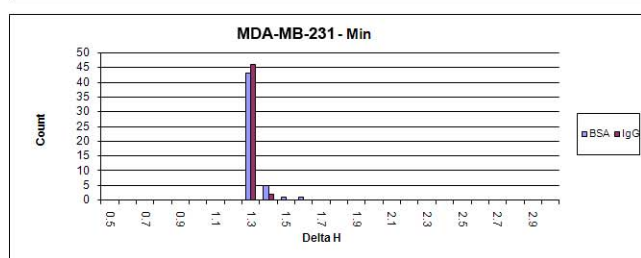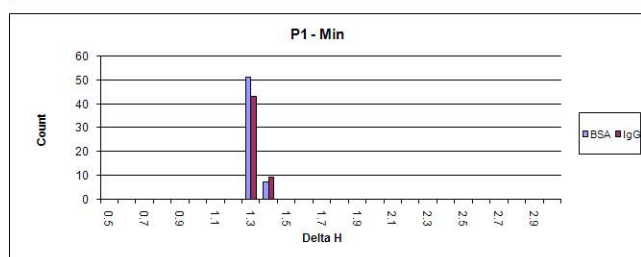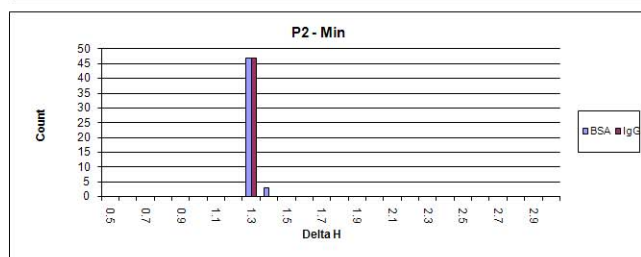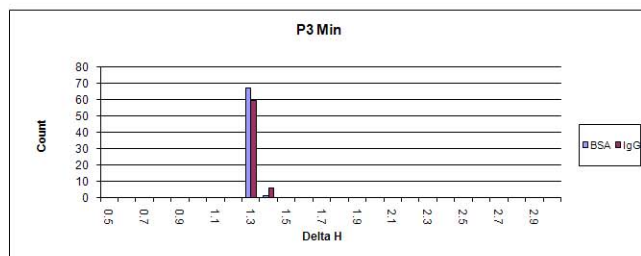

Supplement: c2lc21180g_5.pdf [file c2lc21180g_5.pdf]

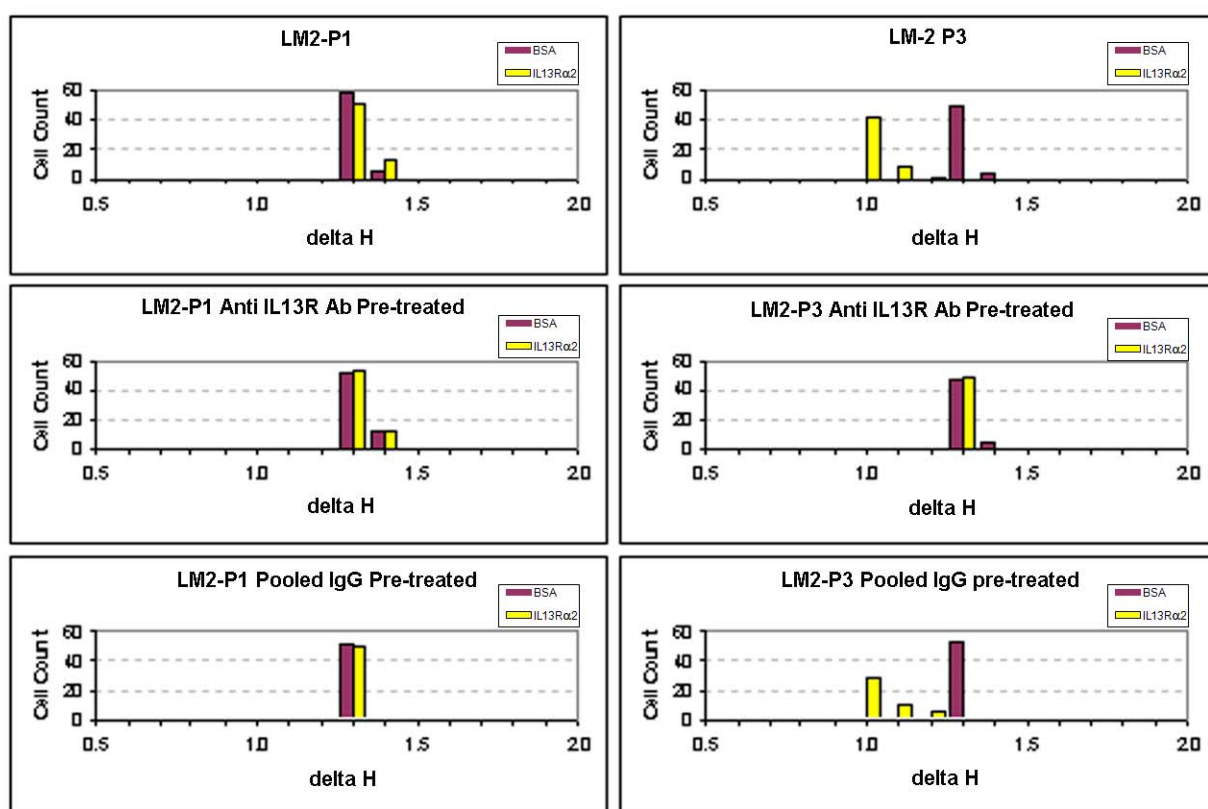

Supplement: c2lc21180g_6.pdf [file c2lc21180g_6.pdf]
